1 **Vimentin plays a functional role in mammary gland regeneration**

2 Reetta Virtakoivu<sup>1,\*</sup>, Emilia Peuhu<sup>1,\*,#</sup>, Anja Mai<sup>1</sup>, Anni Wärri<sup>1</sup>, and Johanna Ivaska<sup>1,2,#</sup>

3 <sup>1</sup>Centre for Biotechnology, University of Turku, 20520 Turku, Finland

4 <sup>2</sup>Department of Biochemistry and Food Chemistry, University of Turku, 20520 Turku, Finland

5

6 \*equal contribution, #corresponding authors

7

8 **Abstract**

9 In the mammary gland, vimentin intermediate filaments are expressed in stromal cells and  
10 in basal epithelial cell populations including gland-reconstituting mammary stem cells  
11 (MaSC), with largely undefined functions. Here, we studied how vimentin deficiency affects  
12 mouse mammary gland development. Our results demonstrate that in adult vimentin  
13 knockout mice (*Vim*<sup>-/-</sup>) mammary ductal outgrowth is delayed. The adult *Vim*<sup>-/-</sup> glands are  
14 characterised by dilated ducts, an imbalance in the proportion of basal to luminal mammary  
15 epithelial cells and a reduction in cells expressing Slug (*Snai2*), an established MaSC  
16 regulator. All of these features are indicative of reduced progenitor cell activity. Accordingly,  
17 isolated *Vim*<sup>-/-</sup> mammary epithelial cells display reduced capacity to form mammospheres,  
18 and altered organoid structure, compared to wt counterparts, when plated in a 3D matrix *in*  
19 *vitro*. Importantly, altered basal epithelial cell number translates into defects in *Vim*<sup>-/-</sup>  
20 mammary gland regeneration *in vivo* in cleared fat pad transplantation studies.  
21 Furthermore, we show that vimentin contributes to stem-like cell properties in triple  
22 negative MDA-MB-231 breast cancer cells, wherein vimentin depletion reduces  
23 tumorsphere formation and alters expression of breast cancer stem cell-associated surface  
24 markers. Together, our findings identify vimentin as a positive regulator of stemness in the  
25 developing mouse mammary gland and in breast cancer cells.

26

27 **Key words:** vimentin, mammary gland, stem cell, breast cancer

## 28 Introduction

29 The mammary gland is a highly dynamic organ that develops through branching  
30 morphogenesis in puberty, evolves during the menstrual cycle, and undergoes terminal  
31 differentiation/dedifferentiation during pregnancy, lactation and involution. Increasing  
32 evidence suggests that the mammary epithelium in both humans and mice comprises a  
33 hierarchy of cells, spanning from bipotent mammary gland stem cells (MaSCs) to  
34 differentiated luminal and basal epithelial cells (Rios et al, 2014, Van Keymeulen et al, 2011,  
35 Visvader & Stingl, 2014). The MaSCs and the basal and luminal progenitor cells are  
36 considered particularly important for ductal elongation during pubertal growth and for  
37 lobulo-alveolar expansion during pregnancy (Tiede & Kang, 2011). Several marker proteins  
38 have been indicated for stem and progenitor cells in the mammary epithelium (Visvader &  
39 Stingl, 2014). The current view suggests that the transcription factors Sox9 and Slug (Snai2)  
40 (Guo et al, 2012), several integrin adhesion receptors (Rangel et al, 2016, Taddei et al,  
41 2008), and molecules involved in Notch and Wnt signalling pathways (Bouras et al, 2008,  
42 Zeng & Nusse, 2010) are expressed in the MaSCs and committed progenitor cells that  
43 localize to the basal mammary epithelial niche (Shackleton et al, 2006).

44 Vimentin is a cytoskeletal type III intermediate filament protein widely used as a marker for  
45 mesenchymal cells (Coulombe & Wong, 2004). Despite the widespread expression of  
46 vimentin, the phenotype of vimentin knockout mice (*Vim<sup>tm1Cba</sup>*, here after called *Vim<sup>-/-</sup>*) is  
47 mild (Colucci-Guyon et al, 1994). Nevertheless, defects in motor coordination (Colucci-  
48 Guyon et al, 1999), wound healing (Cheng et al, 2016, Eckes et al, 2000) and endothelial  
49 function (Nieminen et al, 2006) accompany vimentin loss in these animals. Slug regulates  
50 the expression of vimentin (Vuoriluoto et al, 2011) alongside other genes involved in  
51 epithelial-to-mesenchymal transition (EMT), a key developmental program often activated  
52 during cancer invasion and metastasis (Mani et al, 2008). Interestingly, in vimentin-deficient  
53 cells, also Slug levels are substantially reduced, suggesting the existence of mutual  
54 regulatory pathways that control Slug and vimentin expression (Cheng et al, 2016,  
55 Virtakoivu et al, 2015). Vimentin has been shown to promote extracellular signal-regulated  
56 kinase (ERK)-mediated Slug phosphorylation, Slug-dependent vimentin and receptor  
57 tyrosine kinase Axl expression and MDA-MB-231 breast cancer cell invasion (Virtakoivu et al,  
58 2015).

59 Other intermediate filament proteins such as nestin and GFAP have been implicated in self-  
60 renewal of neural stem cells (Park et al, 2010). Although Slug and vimentin are both  
61 expressed in basal mouse mammary epithelial cells (bMMECs), including the normal tissue  
62 reconstituting MaSCs (Soady et al, 2015, Ye et al, 2015), the functional role of vimentin in  
63 mammary gland development and stemness has not been previously studied. Here, we  
64 report that *Vim*<sup>-/-</sup> mouse mammary epithelium has delayed ductal outgrowth and reduced  
65 regenerative capacity *in vivo* and demonstrate that vimentin is an important regulator of  
66 self-renewal capacity in normal and transformed mammary epithelial cells.

67

## 68 **Results and Discussion**

### 69 ***Vimentin is expressed in basal epithelial and stromal cells in the mouse mammary gland***

70 Supporting previous observations (Soady et al, 2015, Ye et al, 2015), vimentin was found to  
71 be expressed in basal mammary epithelial cells, and in stromal cells in human and mouse  
72 mammary gland tissue sections (Fig. 1A, B). Vimentin expression was lower in the epithelial  
73 compartment than in the stroma although some basal cells particularly in the mouse  
74 mammary gland exhibited higher vimentin expression level (Fig. 1B). In addition,  
75 quantitative PCR analysis of vimentin mRNA expression in mouse mammary gland cell  
76 populations (basal epithelial cells, luminal progenitor and mature luminal epithelial cells and  
77 stromal cells, sorted by flow cytometry based on CD24 and ICAM1 surface expression (Di-  
78 Cicco et al, 2015) revealed notable vimentin levels in stromal cells and to a lesser extent in  
79 basal epithelial cells (Fig. 1C). As expected, luminal progenitor cells and mature luminal  
80 epithelial cells did not express vimentin (Fig. 1C).

### 81 ***Mammary ductal outgrowth is delayed in vimentin knockout mouse***

82 Previous reports describing vimentin expression in the mouse MaSC compartment (Soady et  
83 al, 2015, Wang et al, 2015, Ye et al, 2015) led us to investigate the *Vim*<sup>-/-</sup> and wt control  
84 mouse mammary glands. Lack of vimentin expression in the *Vim*<sup>-/-</sup> mammary gland was  
85 confirmed by IHC (Fig 2A). In laboratory mice, sexual maturity and mammary gland  
86 maturation is reached by 8 weeks after birth (Green & Witham, 2009). Mammary gland  
87 whole mount analyses, performed at the same phase of the oestrus cycle, revealed

88 impaired mammary ductal outgrowth in adult virgin *Vim*<sup>-/-</sup> mice (Fig. 2B-E). The stunted  
89 growth of the mammary ductal network, clearly visible in 10-week-old female *Vim*<sup>-/-</sup> mice  
90 (Fig. 2B,D), was no longer apparent in older animals by 15 weeks of age (Fig. 2C,E). Thus,  
91 these data demonstrate that mammary ductal outgrowth is significantly delayed but not  
92 terminally impaired in the absence of vimentin.

93 Establishment of correct polarity is critical for normal mammary gland development and is  
94 regulated by the co-ordinated actions of adhesion receptors and the cell cytoskeleton. Given  
95 that vimentin interacts with integrins and regulates focal adhesion turnover (Kim et al, 2016,  
96 Kreis et al, 2005, Liu et al, 2015), we wanted to investigate whether the lagging mammary  
97 gland outgrowth is linked to perturbed organization of the mammary bilayer in the *Vim*<sup>-/-</sup>  
98 mice. Although normal mammary epithelial polarisation was observed in adult *Vim*<sup>-/-</sup>  
99 mammary ducts based on the distribution of established markers: keratin-8 (Krt8; luminal)  
100 and keratin-14 (Krt14; basal) (Fig. 2F), the lumens of these ducts appeared to be larger  
101 compared to those of age-matched 15-week-old wt mice (Fig. 2G-H). For comparable  
102 quantification, the measurements were restricted to the relative area of the lumen in  
103 perpendicular cross sections of the smaller ducts at corresponding areas (Fig. 2H). The  
104 enlarged lumen in *Vim*<sup>-/-</sup> mouse mammary ducts resembles a benign breast condition called  
105 ductal ectasia, the dilation of mammary ducts (Rahal et al, 2011) that in humans and mice is  
106 related to aging. In normal mice, ductal ectasia occurs at about two years of age, when  
107 progenitor activity is already reduced (Jackson et al, 2015). Increased levels of mammary  
108 stem/progenitor cells inhibit ectasia in aged mice (Jackson et al, 2015) suggesting that the  
109 accelerated occurrence of ectasia in the *Vim*<sup>-/-</sup> mice could also be related to reduced self-  
110 renewal capacity and MaSC content.

111 The bMMEC layer where vimentin expression was detected (Fig. 1A-C) is also the niche for  
112 the MaSC population (Shackleton et al, 2006), and vimentin is a well-characterized target  
113 gene of Slug (Vuoriluoto et al, 2011) that is expressed in bipotent MaSCs (Guo et al, 2012).  
114 Since reduced Slug levels have previously been detected in vimentin-deficient cells (Cheng  
115 et al, 2016, Virtakoivu et al, 2015), the expression of Slug was investigated in adult (10 or 15  
116 weeks old) *Vim*<sup>-/-</sup> and wt mouse mammary gland tissue sections by IHC (Fig. 2J). In the wt  
117 mammary gland Slug labelling resulted in a previously reported basal epithelial expression  
118 pattern (Guo et al, 2012) (Fig. 2J). While the *Vim*<sup>-/-</sup> mammary epithelium also contained

119 Slug-positive basal cells (Fig. 2J), the amount of these cells was significantly reduced (Fig.  
120 2K). These data suggest that vimentin could regulate the basal MaSC/progenitor cell  
121 population in the mouse mammary gland.

### 122 ***Vimentin deficiency leads to reduced proportion of basal mammary epithelial cells***

123 To evaluate the basal to luminal MMEC ratio, we isolated MMECs from 15-week-old wt and  
124 *Vim*<sup>-/-</sup> mice, and surface labelled single cell suspensions to detect CD24 expression in  
125 combination with CD29 (integrin beta 1) or CD49f (integrin alpha 6). From lineage negative  
126 cells (CD31<sup>neg</sup>CD45<sup>neg</sup>), the proportion of basal (CD24<sup>int</sup>CD29<sup>+</sup>, CD24<sup>int</sup>CD49f<sup>+</sup>) and luminal  
127 (CD24<sup>hi</sup>CD29<sup>neg</sup>, CD24<sup>hi</sup>CD49f<sup>neg</sup>) MMECs was then quantified by flow cytometry (Fig. 3A-B)  
128 (Taddei et al, 2008). Vimentin deficiency led to significantly (p<0.05) or almost significantly  
129 (p=0.05) reduced proportion of bMMECs with both the employed labelling strategies (Fig.  
130 3A-B) as well as with an alternative basal/mature luminal epithelial labelling against CD61  
131 (integrin beta3) in combination with CD29 and CD49f (Fig. S1A-B), suggesting that the  
132 mammary epithelial compartment harbouring the MaSC/progenitor cells is diminished in  
133 the absence of vimentin.

### 134 ***MMECs from vimentin knockout mice form less mammospheres and filled organoids***

135 Mammary progenitor cells can be distinguished based on their ability to generate and  
136 propagate colonies in suspension *in vitro*. Both human and mouse MaSCs can form  
137 mammospheres in suspension (Dontu et al., 2003; Liao et al., 2007) and the ability of cells to  
138 generate mammospheres reflects the number of self-renewing, regenerative MaSCs within  
139 the cell population (Liao et al., 2007). To investigate the ability of *Vim*<sup>-/-</sup> and wt MMECs to  
140 grow as mammospheres, equal numbers of *Vim*<sup>-/-</sup> and wt MMECs were seeded at low  
141 density in low attachment conditions. While the size of *Vim*<sup>-/-</sup> mammospheres was  
142 comparable to wt, the number of mammospheres formed by *Vim*<sup>-/-</sup> MMECs was  
143 significantly lower (Fig. 3C-E). These data demonstrate that primary *Vim*<sup>-/-</sup> MMECs have a  
144 reduced level of self-renewing cells compared to their wt counterparts. Similarly, MMECs  
145 isolated from Slug knockout mice have reduced ability to generate mammospheres *in vitro*  
146 (Nassour et al, 2012), suggesting that vimentin and Slug could jointly contribute to a  
147 common self-renewal pathway in mammary epithelial cells.

148 MMECs cultured in laminin-rich reconstituted basement membrane (rBM) have similar  
149 features to mammary epithelium *in vivo*, including the formation of acini-like organoids with  
150 a hollow lumen and apico-basal polarity. The mammary ductal lumen is formed when the  
151 inner cell population is cleared by anoikis-like cell death mechanisms (Mailleux et al, 2007).  
152 Interestingly, *Vim*<sup>-/-</sup> MMECs that were seeded as single cells in three dimensional (3D) rBM  
153 formed organoids with altered morphology compared to wt MMECs. Vimentin-deficient  
154 organoids formed a lumen significantly more often than the wt organoids (Fig. 3F-G). This  
155 observation could be related to the reduced proportion of basal epithelial cells in the *Vim*<sup>-/-</sup>  
156 mammary gland as the luminal population predominantly forms hollow acini in traditional  
157 Matrigel colony-forming assays while the basal cell population tends to form a more  
158 heterogeneous array of structures, including ductal forms and solid spheroids (Shackleton et  
159 al., 2006; Stingl et al., 2006). Interestingly, this *in vitro* phenotype resembles the enlarged  
160 mammary epithelial lumen in *Vim*<sup>-/-</sup> tissue sections *in vivo* (Fig. 2H-I). Together, our data  
161 suggests that vimentin expression regulates basal cell compartment and the number of self-  
162 renewing MaSCs in the mouse mammary epithelium.

### 163 ***Vimentin silencing reduces tumorsphere formation in MDA-MB-231 breast carcinoma cells***

164 The existence and regulation of stem cell populations has been a matter of intense research  
165 in the context of breast cancer. Previously, vimentin expression was shown to increase  
166 during serial tumorsphere culture of several breast cancer cell lines (Borgna et al, 2012), and  
167 increased vimentin and Slug expression was demonstrated in a low adherent and more  
168 metastatic side population of MDA-MB-231 human breast cancer cells (Morata-Tarifa 2016).  
169 To investigate whether vimentin regulates the stem cell associated features of the triple-  
170 negative and mesenchymal-like MDA-MB-231 breast cancer cells, vimentin was silenced  
171 with an siRNA smartpool (Fig. 4A), previously reported to be specific for vimentin with no  
172 evidence of off-target effects using gold-standard controls (Virtakoivu et al, 2015). CD49f  
173 and CD61, in particular, have been described as markers of breast cancer stem cells (Brooks  
174 et al, 2016, Vaillant et al, 2008). Interestingly, vimentin knockdown resulted in a significant  
175 downregulation of CD49f and CD61 cell surface expression (Fig. 4B). Importantly, in low  
176 attachment assays, MDA-MB-231 tumorsphere formation was reduced in the absence of  
177 vimentin based on the number of spheres (Fig. 4D) and on total protein content of spheres  
178 generated by equal numbers of seeded vimentin-silenced or control cells (Fig. 4E). These

179 results indicate that vimentin influences tumorsphere formation capacity and the  
180 expression of integrin adhesion receptors in breast cancer cells *in vitro*. In breast  
181 carcinomas, vimentin expression is most prevalent in the triple negative subtype (61%  
182 vimentin positive) and vimentin positivity correlates strongly with nuclear Slug expression  
183 (Virtakoivu et al, 2015). Accordingly, vimentin expression is typically associated with high  
184 tumour invasiveness and resistance to chemotherapy (Korsching et al, 2005, Yamashita et al,  
185 2013). It has also been suggested that vimentin-expressing breast carcinomas could be  
186 derived from the bipotent breast progenitor cells (Korsching et al, 2005). Our data  
187 demonstrating that vimentin influences tumorsphere formation in breast cancer cells  
188 supports this hypothesis. Recently, vimentin knockdown in orthotopic breast cancer  
189 allografts in a hyperinsulinemia mouse model was shown to reduce pulmonary metastasis  
190 (Zelenko et al, 2017). Together, these findings suggest that vimentin contributes to breast  
191 cancer initiation and progression.

#### 192 ***Regenerative capacity is reduced in vimentin knockout mouse mammary glands***

193 Finally, to evaluate how vimentin affects MaSC capacity *in vivo*, we grafted adult wt or *Vim*-  
194 *-/-* mammary gland pieces into epithelium-free fat pads of prepubertal wt recipient mice.  
195 Vimentin deficiency did not influence the outgrowth from primary transplants when the  
196 growth area was quantified 10 weeks post-transplantation (Fig. 5A-B). These data could not  
197 be directly compared to differential rates of normal mammary gland development in wt and  
198 *Vim*-*-/-* mice (Fig. 2D-G) as the outgrowth from the transplants was much slower.  
199 Interestingly, when the primary transplants with noticeable epithelial growth (Fig. S1C) were  
200 further cut into pieces and re-transplanted in secondary recipients, *Vim*-*-/-* transplants  
201 demonstrated a substantial loss in growth capacity 15 weeks post-transplantation (Fig. 5C-  
202 D). Additionally, the take-on-rate demonstrating the fraction of transplants that initiated  
203 growth was only compromised at the second round of transplantation (Fig. 5E). The inability  
204 to re-establish a ductal tree only in the secondary transplants strongly indicates a lack of  
205 functional stem cells in *Vim*-*-/-* mammary epithelium. A similar defect in mammary gland  
206 self-renewal capacity was previously observed in mice where *Itgb1* was conditionally  
207 deleted in the basal epithelial cells (Taddei et al, 2008). The data presented here suggest  
208 that vimentin plays a functional role in the regulation of regenerative capacity in the  
209 mammary gland *in vivo*.

210 Our data demonstrate that vimentin regulates the rate of mammary ductal outgrowth, a  
211 process involving MaSCs, during mouse puberty, and affects the morphology of mature  
212 mammary ducts *in vivo*. Interestingly, Slug knockout mice also have delayed mammary  
213 gland development during puberty and MMECs isolated from these mice have reduced  
214 regenerative capacity of *in vitro* (Nassour et al, 2012), suggesting that vimentin and Slug  
215 regulate the same processes in the mammary epithelium. Together, our data suggest that  
216 Slug and vimentin mutually and positively regulate mammary gland stemness and  
217 potentially influence cancer stem cell properties in breast cancer cells. As a regulator of Slug  
218 expression, vimentin could even function upstream of Slug in the MaSC/progenitor  
219 compartment and thereby affect the regenerative capacity of the mammary gland.

220

## 221 **Conclusions**

222 Here, we have investigated for the first time the functional consequences of vimentin loss  
223 for mammary gland biology. These studies were prompted by the established role of  
224 vimentin in EMT (Mendez et al, 2010), and the strong links between EMT-inducing factors  
225 and the self-renewing capacity of the mammary epithelium (Asiedu et al, 2014, Ye et al,  
226 2015). We have earlier demonstrated that vimentin is required for EMT induced by Ras, Slug  
227 and TGF $\beta$  in cancer cells (Vuoriluoto et al, 2011). In addition, we have defined a signal-  
228 integrating function for vimentin on the ERK-MAPK-Slug-EMT axis where vimentin  
229 contributes to EMT progression (Virtakoivu et al, 2015). Here we identify vimentin as a  
230 regulator of regenerative capacity in the mouse mammary gland *in vivo* and *in vitro*, and  
231 demonstrate that vimentin also supports the formation of breast cancer tumorspheres  
232 indicative of a role in regulating cancer stem cell capacity (Fig. 5F). Importantly, vimentin  
233 appears to be a central node in stem cell programs operating in cancer and normal stem  
234 cells. Understanding how vimentin contributes to mammary stem cell regulation can be of  
235 importance in developing therapeutic strategies against breast cancer.

236 Furthermore, we demonstrate a delay in the development of *Vim*<sup>-/-</sup> mouse mammary ducts,  
237 characterised by the depletion of basal epithelial cells and the presence of enlarged lumens,  
238 which could be related to impaired mammary gland stem cell function (Fig. 5F).  
239 Interestingly, we find many parallels between the mammary gland defects in *Vim*<sup>-/-</sup> mice



240 and those reported earlier for Slug knockout animals. The Slug knockout mouse has delayed  
241 mammary gland development during puberty and MMECs from these mice have reduced  
242 capacity to generate mammospheres (Nassour et al, 2012). In addition, other Slug-regulated  
243 mammary gland processes such as alveologenesis and involution (Castillo-Lluva et al, 2015,  
244 Desgrosellier et al, 2014) could be affected in the *Vim*<sup>-/-</sup> mice. The role of vimentin in the  
245 tertiary differentiation of mouse mammary gland will be studied in the future.

246

## 247 **Materials and methods**

### 248 *Animals*

249 Vimentin-deficient homozygote (*Vim*<sup>-/-</sup>) (Colucci-Guyon et al, 1999) and wt mice in mixed  
250 129/Sv × C57BL/6 background were generated through heterozygote and homozygote  
251 mating. The PCR genotyping method was used to analyse the genotype of the mice. Age-  
252 matched female mice were used in all experiments. Mice were synchronized for estrus cycle  
253 in experiments where individual mice were examined. Otherwise, a minimum of two mice  
254 were pooled per MMEC isolation. For cell sorting and qPCR experiments, mammary glands  
255 were collected from adult virgin wt BALB/cByJ female mice. For frozen mammary gland  
256 sections, tissues were collected from adult virgin wt C57Bl/6 female mice. All animal studies  
257 were ethically performed and authorised by the National Animal Experiment Board and in  
258 accordance with The Finnish Act on Animal Experimentation (Animal licence numbers  
259 7522/04.10.03/2012, ESAVI-5588-04.10.07-2014, ESAVI-9339-04.10.07-2016).

### 260 *Whole mount staining and analysis*

261 The fourth mammary gland was dissected and placed on an object glass, left to adhere for  
262 few minutes, fixed in Carnoy's medium (60% EtOH, 30% chloroform, 10% glacial acetic acid)  
263 overnight (o/n) at +4°C, followed by dehydration in decreasing EtOH series and staining with  
264 carmine alum (0.2% carmine, 0.5% aluminium potassium sulphate dodecahydrate) o/n at  
265 room temperature (RT). Samples were dehydrated and cleared in xylene for 2-3 days.  
266 Mounting was done in DPX Mountant for histology (Sigma) and images were taken with  
267 Zeiss SteREO Lumar V12 stereomicroscope (NeoLumar 0.8× objective, Zeiss AxioCam ICc3  
268 colour camera). All images per gland were combined automatically into a mosaic picture

269 with PhotoShop. Ductal outgrowth was analysed in ImageJ by measuring the distance of the  
270 ductal tree from the inguinal lymph node into the fat pad (adult mice) or by measuring the  
271 area covered by the ductal tree (transplantation).

272

### 273 *MMEC isolation*

274 Ten weeks old or 15-18 weeks old female mice were sacrificed and the inguinal lymph node  
275 was removed. Tissues were minced with scalpel to small pieces and the homogenate was  
276 collected into a collagenase solution (DMEM/F12 media containing 2.5% FCS, 5 µg/mL  
277 insulin, 50 µg/mL gentamicin, and 200 mM glutamine and 20 mg of Collagenase XI (Sigma)  
278 for 1 g of tissue) and incubated at +37 °C with agitation (120 rpm) for 2-3 h. The resulting  
279 cell suspension was centrifuged at 1500 rpm and resuspended in DMEM/F12 medium  
280 (containing 1 % of penicillin/ streptomycin and 50 µg/mL gentamicin) and DNase I (20 U/ml)  
281 for 3 min. The sample was then subjected to five pulse centrifugation steps at 1500 rpm;  
282 every time the supernatant was carefully removed and the pellet was resuspended to 10 ml  
283 of DMEM/F12 medium. Next, organoids were incubated with Accutase (StemCell  
284 Technologies) to obtain a single cell suspension and cells were pipetted through a 70 µm cell  
285 strainer (BD Biosciences). Cells were used for mammosphere assays, flow cytometry and  
286 western blotting.

### 287 *Cell culture and transfections*

288 MDA-MB-231 cells were cultured in DMEM supplemented with 10 % FBS, 1% L-glutamate  
289 and non-essential amino acids. Lipofectamine 3000 transfection reagent (Invitrogen) was  
290 used for siRNA transfections and the transfection was done according to the manufacturer's  
291 instructions and as previously described (Virtakoivu et al, 2015). Silenced cells were used for  
292 experiments 48-72 h after transfection. Specific silencing of vimentin by single siRNA oligos  
293 in the vimentin siRNA Smartpool was previously validated by western blotting (Virtakoivu et  
294 al, 2015).

### 295 *Antibodies*

296 The following antibodies were used in the study: For immunofluorescence and Western  
297 blotting, Acta2 (alpha smooth muscle actin; clone 1A4, Sigma), Krt8 (keratin 8, clone Troma-

298 I, Hybridoma Bank), Krt14 (keratin 14, Covance), Slug (Snai2, C19G7, Cell Signalling), GAPDH  
299 (5G4 Mab 6C5, Hytest) and vimentin (VIM, V9, Santa Cruz; D21H3, Cell Signalling). For flow  
300 cytometry of mouse cells, CD45-Pacific Blue (clone 30-F11), CD31-Pacific Blue (clone 390),  
301 CD61-A647 (ITGB3, clone 2C9.G2), CD29-A488 (ITGB1, clone HM $\beta$ 1-1), CD49f-A488 (ITGA6,  
302 clone GoH3) (all from BioLegend) and CD24-FITC (clone M1/69; BD Biosciences) antibodies  
303 were used. For flow cytometry of human cells, CD61 (ITGB3, MCA728, Serotec), and CD49f  
304 (ITGA6, MCA699, clone GoH3, Serotec) antibodies were used. AlexaFluor-conjugated (Life  
305 Technologies) and HRP-linked (GE Healthcare) secondary antibodies against rat, rabbit and  
306 mouse IgG were used in immunolabelling, flow cytometry and Western blotting.

### 307 *In vitro organoid and mammosphere assays*

308 For organoid and mammosphere cultures, cells were counted and different amounts of cells  
309 were plated in 96-well low attachment plates (Corning) and allowed to proliferate for 6-9  
310 days. For organoid assays the following medium was used; Epicult Base medium (StemCell  
311 Technologies) supplemented with Epicult supplements, 10 ng/ml EGF, 4  $\mu$ g/ml heparin, 10  
312 ng/ml bFGF, 5  $\mu$ M Y-27632 ROCK inhibitor, 5 % matrigel and 5 % FCS. For mammosphere  
313 assays the same medium was used without ROCK inhibitor, Matrigel and FCS. When using  
314 vimentin or control siRNA silenced MDA-MB-231 cells for the mammosphere assays, the  
315 siRNA mix was added to the cells at day 3. Formed mammospheres were manually counted  
316 and images taken with EVOS Cell Imaging System (ThermoFisher Scientific). All wells / cell  
317 type / cell amount were pooled together and lysed for western blotting.

318 For immunofluorescence staining the organoids were gently collected and centrifuged at  
319 700 rpm for 5 minutes followed by 4 % PFA fixation. Organoids were resuspended into 20 %  
320 matrigel in PBS and plated on matrigel coated 8-well Ibidi  $\mu$ -slide wells (Ibidi GmbH). Next,  
321 organoids were permeabilized with 0.5 % Triton-X in PBS for 10 minutes, washed three  
322 times with 100 mM glycine in PBS and blocked with 5 % horse serum, 0.3 % triton-X, 0.2 %  
323 BSA, and 0.05% NaN<sub>3</sub> in PBS for 1.5 h at RT. Phalloidin Atto-488 (1/50) (Sigma-Aldrich) was  
324 incubated o/n, organoids were washed three times with 0.3 % triton-X in PBS and nuclei  
325 stained with Hoechst (1/3000). Organoids were washed with PBS, mounted with Vectashield  
326 and left to dry for 1 h at + 37°C. Imaging was done with Carl Zeiss LSM780 laser-scanning  
327 confocal microscope and quantification with ImageJ software.

## 328 *Immunohistochemistry*

329 Formalin-fixed paraffin-embedded human mammary gland tissues were collected from the  
330 archives of the Department of Pathology, Helsinki University Central Hospital, Helsinki,  
331 Finland. An Institutional Review Board of the Helsinki University Central Hospital approved  
332 the study. Mammary gland tissues destined for formalin or Carnoy's medium fixation and  
333 paraffin embedding were collected from 10-15 weeks old female mice of the indicated  
334 genotype. Samples were deparaffinised and rehydrated. Epitope unmasking was performed  
335 in citrate buffer using 2100 Antigen retriever (Aptum, UK). Samples were blocked with 0.5%  
336 FCS in PBS for 45 min and incubated overnight in blocking buffer, followed by washing with  
337 PBS and incubation with fluorochrome-conjugated secondary antibodies for 2 h at RT.  
338 Samples were washed, stained with DAPI (4',6-Diamidino-2-Phenylindole, Dihydrochloride;  
339 Life Technologies) and mounted in Mowiol containing DABCO® (Sigma) anti-fading reagent.  
340 Imaging was conducted with a Zeiss Axiovert 200M inverted wide-field microscope  
341 (hematoxylin-eosin), 3i CSU-W1 spinning disk confocal microscope (Intelligent imaging  
342 innovations) with Hamamatsu CMOS Orca Flash 4 or with Carl Zeiss LSM780 laser scanning  
343 confocal microscope.

## 344 *Flow cytometry*

345 Cells were suspended into Tyrodes buffer (10 mM HEPES-NaOH at pH 7.5, 137 mM NaCl,  
346 2.68 mM KCl, 1.7 mM MgCl<sub>2</sub>, 11.9 mM NaHCO<sub>3</sub>, 3.5 mM glucose, 0.1 % BSA) and  
347 approximately 5 x10<sup>5</sup> cells were used per staining. In the case of MMEC cells, directly  
348 conjugated antibodies were added and incubated at +4°C for 30 minutes, washed twice and  
349 fixed with 4 % PFA. For staining the vimentin-silenced MDA-MB-231 cells, cells were first  
350 fixed with 4 % PFA, washed with PBS and suspended into PBS containing 1 % BSA. Primary  
351 antibodies were incubated for 30 minutes followed by washes and incubation with Alexa  
352 Fluor 488 /647 secondary antibodies (1/400). Samples were run with BD LSR Fortessa flow  
353 cytometer (BD Biosciences) and analysed with Flowing software (Cell Imaging Core, Turku  
354 Centre for Biotechnology).

## 355 *Cell preparation, sorting and qPCR*

356 Samples were prepared as previously described (Di-Cicco et al, 2015, Peuhu et al. 2017).  
357 Single cells were prepared from inguinal mammary glands taken from virgin adult BALB/cByJ  
358 females according to a detailed protocol described previously (Di-Cicco et al, 2015). Freshly  
359 isolated cells were incubated at 4 °C for 20 min with the conjugated antibodies. Labelled  
360 cells were sorted on a FACSVantage flow cytometer (BD Biosciences, San Jose, CA, USA), and  
361 data analyzed using FlowJo software. CD45<sup>+</sup> immune cells and CD31<sup>+</sup> endothelial cells were  
362 excluded during the cell sorting procedure. Mammary gland lineage-specific gene  
363 expression (*Krt5*, *Krt18*, and *Pdgfr*) in the purified cell populations was checked by  
364 quantitative PCR (qPCR) as reported (Di-Cicco et al, 2015, Peuhu et al, 2017). RNA was  
365 reverse-transcribed with MMLV H(-) Point reverse transcriptase (Promega, Madison, WI,  
366 USA), and qPCR was performed by monitoring, in real time, the increase in fluorescence of  
367 the SYBR Green dye in a LightCycler® 480 Real-Time PCR System (Roche Applied Science,  
368 Basel, Switzerland). The primers used for qPCR analysis (*Vimentin* and *Gapdh*) were  
369 purchased from SABiosciences/Qiagen (Hilden, Germany).

#### 370 *Western blotting*

371 The immunoblotting was done by using standard western blotting techniques and Odyssey  
372 LICOR imaging system.

#### 373 *Cleared fat pad transplantation*

374 Cleared fat pad transplantation was conducted as in (Peuhu et al, 2017). Briefly, mammary  
375 gland pieces (approx. 1 mm<sup>3</sup>) from 15 weeks old wt or *Vim*<sup>-/-</sup> female donor mice were  
376 transplanted under isoflurane anesthesia and analgesia (Temgesic, Rimadyl) to the fourth  
377 fat pad of 3 weeks old wt hosts (wt and *Vim*<sup>-/-</sup> transplants on each side of the host) after  
378 clearing the fat pad up to, and including, the lymph node. The removed part of the fat pad  
379 was fixed and stained to confirm complete removal of the recipient mouse mammary  
380 epithelium (Suppl. Fig.1). Growth of transplants was analyzed after 10 weeks by Carmine-  
381 alum staining of the fourth mammary gland whole mounts. For secondary transplantation,  
382 one mouse with wt and *Vim*<sup>-/-</sup> primary transplants in each fat pad was chosen randomly,  
383 both fat pads were excised, and an area close to the site of primary transplantation in each  
384 fat pad was cut into 5 pieces. These pieces were further transplanted in the fourth fat pads  
385 of 3 weeks old wt recipient mice (wt and *Vim*<sup>-/-</sup> transplants on each side of the host).

386 Growth of transplants was analyzed after 15 weeks by Carmine-alum staining of the fourth  
387 mammary gland whole mounts. Growth take-on-rate was calculated from all the transplant  
388 samples.

### 389 *Statistical analysis*

390 Sample size for the studies was chosen according to previous studies in the same area of  
391 research. A minimum of 3 mice was analysed for each genotype for comparison, and the  
392 data were assumed to follow a normal distribution. The GraphPad program and Student's t-  
393 test (paired or unpaired, two-tailed) were used for all statistical analyses. Data are  
394 presented in column graphs with mean  $\pm$  standard error of mean (SEM) and p-values.  
395 Individual data points per condition are shown when  $n \leq 15$  and n-numbers are indicated in  
396 Figure legends.

### 397 **Author contributions**

398 EP and JI contributed to the conception and design of the study. RV and AM conducted and  
399 analysed in vitro experiments. RV, EP and AW performed in vivo experiments and IHC  
400 analysis. EP conducted the cleared fat pad transplantations. EP wrote the manuscript and JI,  
401 RV and AW edited the manuscript. JI supervised the research.

### 402 **Acknowledgements**

403 We would like to thank J. Jukkala, J. Siivonen, P. Laasola and M. Saari for instrumental  
404 technical assistance, Dr. H. Hamidi for editing of the manuscript, Dr. E. Närva, Dr. C.  
405 Guzman, and Dr. G. Jacquemet for critical reviewing of the manuscript, and Dr. M.-A.  
406 Deugnier and A. Di-Cicco for vimentin qPCR analysis. Prof. J. Eriksson is thanked for sharing  
407 the vimentin knockout mouse strain and Dr. F. Cheng for assistance in sample preparation.  
408 The Turku Centre for Biotechnology Cell Imaging Core, University of Turku Central Animal  
409 Laboratory, and Biocenter Finland are acknowledged for services, instrumentation and  
410 expertise.

### 411 **Competing interests**

412 The authors declare no conflict of interest.

413 **Funding**

414 This study has been supported by the Academy of Finland, the Sigrid Juselius Foundation,  
415 the Finnish Cancer Organisation and an ERC consolidator grant. RV has been supported by K.  
416 Albin Johansson Foundation and the Turku Doctoral Program of Biomedical Sciences. EP has  
417 been supported by the Academy of Finland Postdoctoral fellowship.

418 **References**

- 419 Asiedu MK, Beauchamp-Perez FD, Ingle JN, Behrens MD, Radisky DC, & Knutson KL (2014)  
420 AXL induces epithelial-to-mesenchymal transition and regulates the function of breast  
421 cancer stem cells. *Oncogene* **33**: 1316-1324
- 422 Borgna S, Armellin M, di Gennaro A, Maestro R, & Santarosa M (2012) Mesenchymal traits  
423 are selected along with stem features in breast cancer cells grown as mammospheres. *Cell*  
424 *Cycle* **11**: 4242-4251
- 425 Bouras T, Pal B, Vaillant F, Harburg G, Asselin-Labat ML, Oakes SR, Lindeman GJ, & Visvader  
426 JE (2008) Notch signaling regulates mammary stem cell function and luminal cell-fate  
427 commitment. *Cell Stem Cell* **3**: 429-441
- 428 Brooks DL, Schwab LP, Krutilina R, Parke DN, Sethuraman A, Hoogewijs D, Schorg A, Gotwald  
429 L, Fan M, Wenger RH, & Seagroves TN (2016) ITGA6 is directly regulated by hypoxia-  
430 inducible factors and enriches for cancer stem cell activity and invasion in metastatic breast  
431 cancer models. *Mol Cancer* **15**: 26-016-0510-x
- 432 Castillo-Lluva S, Hontecillas-Prieto L, Blanco-Gomez A, Del Mar Saez-Freire M, Garcia-  
433 Cenador B, Garcia-Criado J, Perez-Andres M, Orfao A, Canamero M, Mao JH, Gridley T,  
434 Castellanos-Martin A, & Perez-Losada J (2015) A new role of SNAI2 in postlactational  
435 involution of the mammary gland links it to luminal breast cancer development. *Oncogene*  
436 **34**: 4777-4790
- 437 Cheng F, Shen Y, Mohanasundaram P, Lindstrom M, Ivaska J, Ny T, & Eriksson JE (2016)  
438 Vimentin coordinates fibroblast proliferation and keratinocyte differentiation in wound  
439 healing via TGF-beta-Slug signaling. *Proc Natl Acad Sci U S A* **113**: E4320-7

- 440 Colucci-Guyon E, Gimenez Y Ribotta M, Maurice T, Babinet C, & Privat A (1999) Cerebellar  
441 defect and impaired motor coordination in mice lacking vimentin. *Glia* **25**: 33-43
- 442 Colucci-Guyon E, Portier MM, Dunia I, Paulin D, Pournin S, & Babinet C (1994) Mice lacking  
443 vimentin develop and reproduce without an obvious phenotype. *Cell* **79**: 679-694
- 444 Coulombe PA & Wong P (2004) Cytoplasmic intermediate filaments revealed as dynamic and  
445 multipurpose scaffolds. *Nat Cell Biol* **6**: 699-706
- 446 Desgrosellier JS, Lesperance J, Seguin L, Gozo M, Kato S, Franovic A, Yebra M, Shattil SJ, &  
447 Cheresh DA (2014) Integrin alphavbeta3 drives slug activation and stemness in the pregnant  
448 and neoplastic mammary gland. *Dev Cell* **30**: 295-308
- 449 Di-Cicco A, Petit V, Chiche A, Bresson L, Romagnoli M, Orian-Rousseau V, Vivanco M, Medina  
450 D, Faraldo MM, Glukhova MA, & Deugnier MA (2015) Paracrine Met signaling triggers  
451 epithelial-mesenchymal transition in mammary luminal progenitors, affecting their fate.  
452 *Elife* **4**: 10.7554/eLife.06104
- 453 Eckes B, Colucci-Guyon E, Smola H, Nodder S, Babinet C, Krieg T, & Martin P (2000) Impaired  
454 wound healing in embryonic and adult mice lacking vimentin. *J Cell Sci* **113 ( Pt 13)**: 2455-  
455 2462
- 456 Green, MC, & Witham, BA (2009) The Jackson Laboratory Handbook on Genetically  
457 Standardized Mice. 242
- 458 Guo W, Keckesova Z, Donaher JL, Shibue T, Tischler V, Reinhardt F, Itzkovitz S, Noske A,  
459 Zurrer-Hardi U, Bell G, Tam WL, Mani SA, van Oudenaarden A, & Weinberg RA (2012) Slug  
460 and Sox9 cooperatively determine the mammary stem cell state. *Cell* **148**: 1015-1028
- 461 Jackson HW, Waterhouse P, Sinha A, Kislinger T, Berman HK, & Khokha R (2015) Expansion  
462 of stem cells counteracts age-related mammary regression in compound Timp1/Timp3 null  
463 mice. *Nat Cell Biol* **17**: 217-227



- 464 Kim J, Yang C, Kim EJ, Jang J, Kim SJ, Kang SM, Kim MG, Jung H, Park D, & Kim C (2016)  
465 Vimentin filaments regulate integrin-ligand interactions by binding to the cytoplasmic tail of  
466 integrin beta3. *J Cell Sci* **129**: 2030-2042
- 467 Korsching E, Packeisen J, Liedtke C, Hungermann D, Wulfing P, van Diest PJ, Brandt B,  
468 Boecker W, & Buerger H (2005) The origin of vimentin expression in invasive breast cancer:  
469 epithelial-mesenchymal transition, myoepithelial histogenesis or histogenesis from  
470 progenitor cells with bilinear differentiation potential? *J Pathol* **206**: 451-457
- 471 Kreis S, Schonfeld HJ, Melchior C, Steiner B, & Kieffer N (2005) The intermediate filament  
472 protein vimentin binds specifically to a recombinant integrin alpha2/beta1 cytoplasmic tail  
473 complex and co-localizes with native alpha2/beta1 in endothelial cell focal adhesions. *Exp*  
474 *Cell Res* **305**: 110-121
- 475 Liu CY, Lin HH, Tang MJ, & Wang YK (2015) Vimentin contributes to epithelial-mesenchymal  
476 transition cancer cell mechanics by mediating cytoskeletal organization and focal adhesion  
477 maturation. *Oncotarget* **6**: 15966-15983
- 478 Mailleux AA, Overholtzer M, Schmelzle T, Bouillet P, Strasser A, & Brugge JS (2007) BIM  
479 regulates apoptosis during mammary ductal morphogenesis, and its absence reveals  
480 alternative cell death mechanisms. *Dev Cell* **12**: 221-234
- 481 Mani SA, Guo W, Liao MJ, Eaton EN, Ayyanan A, Zhou AY, Brooks M, Reinhard F, Zhang CC,  
482 Shipitsin M, Campbell LL, Polyak K, Brisken C, Yang J, & Weinberg RA (2008) The epithelial-  
483 mesenchymal transition generates cells with properties of stem cells. *Cell* **133**: 704-715
- 484 Mendez MG, Kojima S, & Goldman RD (2010) Vimentin induces changes in cell shape,  
485 motility, and adhesion during the epithelial to mesenchymal transition. *FASEB J* **24**: 1838-  
486 1851
- 487 Nassour M, Idoux-Gillet Y, Selmi A, Come C, Faraldo ML, Deugnier MA, & Savagner P (2012)  
488 Slug controls stem/progenitor cell growth dynamics during mammary gland morphogenesis.  
489 *PLoS One* **7**: e53498

- 490 Nieminen M, Henttinen T, Merinen M, Marttila-Ichihara F, Eriksson JE, & Jalkanen S (2006)  
491 Vimentin function in lymphocyte adhesion and transcellular migration. *Nat Cell Biol* **8**: 156-  
492 162
- 493 Park D, Xiang AP, Mao FF, Zhang L, Di CG, Liu XM, Shao Y, Ma BF, Lee JH, Ha KS, Walton N, &  
494 Lahn BT (2010) Nestin is required for the proper self-renewal of neural stem cells. *Stem Cells*  
495 **28**: 2162-2171
- 496 Peuhu E, Kaukonen R, Lerche M, Saari M, Guzman C, Rantakari P, De Franceschi N, Warri A,  
497 Georgiadou M, Jacquemet G, Mattila E, Virtakoivu R, Liu Y, Attieh Y, Silva KA, Betz T,  
498 Sundberg JP, Salmi M, Deugnier MA, Eliceiri KW et al (2017) SHARPIN regulates collagen  
499 architecture and ductal outgrowth in the developing mouse mammary gland. *EMBO J* **36**:  
500 165-182
- 501 Rahal RM, de Freitas-Junior R, Carlos da Cunha L, Moreira MA, Rosa VD, & Conde DM (2011)  
502 Mammary duct ectasia: an overview. *Breast J* **17**: 694-695
- 503 Rangel MC, Bertolette D, Castro NP, Klauzinska M, Cuttitta F, & Salomon DS (2016)  
504 Developmental signaling pathways regulating mammary stem cells and contributing to the  
505 etiology of triple-negative breast cancer. *Breast Cancer Res Treat* **156**: 211-226
- 506 Rios AC, Fu NY, Lindeman GJ, & Visvader JE (2014) In situ identification of bipotent stem  
507 cells in the mammary gland. *Nature* **506**: 322-327
- 508 Shackleton M, Vaillant F, Simpson KJ, Stingl J, Smyth GK, Asselin-Labat ML, Wu L, Lindeman  
509 GJ, & Visvader JE (2006) Generation of a functional mammary gland from a single stem cell.  
510 *Nature* **439**: 84-88
- 511 Soady KJ, Kendrick H, Gao Q, Tutt A, Zvelebil M, Ordonez LD, Quist J, Tan DW, Isacke CM,  
512 Grigoriadis A, & Smalley MJ (2015) Mouse mammary stem cells express prognostic markers  
513 for triple-negative breast cancer. *Breast Cancer Res* **17**: 31-015-0539-6

- 514 Taddei I, Deugnier MA, Faraldo MM, Petit V, Bouvard D, Medina D, Fassler R, Thiery JP, &  
515 Glukhova MA (2008) Beta1 integrin deletion from the basal compartment of the mammary  
516 epithelium affects stem cells. *Nat Cell Biol* **10**: 716-722
- 517 Tiede B & Kang Y (2011) From milk to malignancy: the role of mammary stem cells in  
518 development, pregnancy and breast cancer. *Cell Res* **21**: 245-257
- 519 Vaillant F, Asselin-Labat ML, Shackleton M, Forrest NC, Lindeman GJ, & Visvader JE (2008)  
520 The mammary progenitor marker CD61/beta3 integrin identifies cancer stem cells in mouse  
521 models of mammary tumorigenesis. *Cancer Res* **68**: 7711-7717
- 522 Van Keymeulen A, Rocha AS, Ousset M, Beck B, Bouvencourt G, Rock J, Sharma N, Dekoninck  
523 S, & Blanpain C (2011) Distinct stem cells contribute to mammary gland development and  
524 maintenance. *Nature* **479**: 189-193
- 525 Virtakoivu R, Mai A, Mattila E, De Franceschi N, Imanishi SY, Corthals G, Kaukonen R, Saari  
526 M, Cheng F, Torvaldson E, Kosma VM, Mannermaa A, Muharram G, Gilles C, Eriksson J, Soini  
527 Y, Lorens JB, & Ivaska J (2015) Vimentin-ERK Signaling Uncouples Slug Gene Regulatory  
528 Function. *Cancer Res* **75**: 2349-2362
- 529 Visvader JE & Stingl J (2014) Mammary stem cells and the differentiation hierarchy: current  
530 status and perspectives. *Genes Dev* **28**: 1143-1158
- 531 Vuoriluoto K, Haugen H, Kiviluoto S, Mpindi JP, Nevo J, Gjerdrum C, Tiron C, Lorens JB, &  
532 Ivaska J (2011) Vimentin regulates EMT induction by Slug and oncogenic H-Ras and  
533 migration by governing Axl expression in breast cancer. *Oncogene* **30**: 1436-1448
- 534 Wang D, Cai C, Dong X, Yu QC, Zhang XO, Yang L, & Zeng YA (2015) Identification of  
535 multipotent mammary stem cells by protein C receptor expression. *Nature* **517**: 81-84
- 536 Yamashita N, Tokunaga E, Kitao H, Hisamatsu Y, Taketani K, Akiyoshi S, Okada S, Aishima S,  
537 Morita M, & Maehara Y (2013) Vimentin as a poor prognostic factor for triple-negative  
538 breast cancer. *J Cancer Res Clin Oncol* **139**: 739-746

539 Ye X, Tam WL, Shibue T, Kaygusuz Y, Reinhardt F, Ng Eaton E, & Weinberg RA (2015) Distinct  
540 EMT programs control normal mammary stem cells and tumour-initiating cells. *Nature* **525**:  
541 256-260

542 Zelenko Z, Gallagher EJ, Tobin-Hess A, Belardi V, Rostoker R, Blank J, Dina Y, & LeRoith D  
543 (2017) Silencing vimentin expression decreases pulmonary metastases in a pre-diabetic  
544 mouse model of mammary tumor progression. *Oncogene* **36**: 1394-1403

545 Zeng YA & Nusse R (2010) Wnt proteins are self-renewal factors for mammary stem cells  
546 and promote their long-term expansion in culture. *Cell Stem Cell* **6**: 568-577

547

## 548 **Figure Legends**

### 549 **Figure 1. Vimentin is expressed in basal epithelial and stromal cells in the mammary gland**

550 **A-B.** Immunohistochemical (IHC) analysis of vimentin expression in human (**A**) and mouse  
551 mammary glands (**B**). Cross-sections of vimentin- and DAPI-labelled (**A**; single image section)  
552 or vimentin-, Acta2 (basal cells) and DAPI-labelled (**B**; maximum projection image)  
553 mammary ducts and magnification of the region of interest (ROI) are shown. The  
554 approximate position of the basement membrane (dashed line) and vimentin-positive basal  
555 cells in the ROI (arrow) are indicated. Scale bars represent 20  $\mu\text{m}$  (original image) and 10  $\mu\text{m}$   
556 (ROI).

557 **C.** Quantitative PCR analysis of vimentin mRNA expression in mouse mammary gland cell  
558 populations sorted by FACS into basal epithelial cells ( $\text{Lin}^{\text{neg}}\text{CD24}^{\text{int}}\text{ICAM-1}^{\text{hi}}$ ), luminal  
559 progenitor cells ( $\text{Lin}^{\text{neg}}\text{CD24}^{\text{hi}}\text{ICAM-1}^{\text{int}}$ ), mature luminal epithelial cells ( $\text{Lin}^{\text{neg}}\text{CD24}^{\text{hi}}\text{ICAM-}$   
560  $1^{\text{neg}}$ ), and stromal cells ( $\text{Lin}^{\text{neg}}\text{CD24}^{\text{neg}}$ ) (mean  $\pm$  SEM, n = 3 - 5). Statistical analysis, unpaired  
561 Student's t-test.

562

### 563 **Figure 2. Mammary ductal outgrowth is delayed in vimentin knockout mice**

564 **A.** Representative mammary gland tissue sections from 15-week-old wt and *Vim*<sup>-/-</sup> female  
565 mice were labelled for nuclei (DAPI), vimentin and Acta2 by IHC-P (n = 3 mice). Scale bar, 10  
566  $\mu$ m.

567 **B-C.** Representative images of mammary gland whole mounts from 10 weeks (**B**) and 15  
568 weeks (**C**) old wt and *Vim*<sup>-/-</sup> mice. Scale bar 2 mm.

569 **D-E.** Quantification of mammary ductal outgrowth beyond the inguinal lymph node in  
570 mammary gland whole mounts from 10 weeks (**D.**) and 15 weeks (**E.**) old wt and *Vim*<sup>-/-</sup>  
571 mice. ( $n_{10 \text{ weeks}} = 8$  mice,  $n_{15 \text{ weeks}} = 12$  mice) (mean  $\pm$  SEM). Statistical analysis, unpaired  
572 Student's t-test.

573 **F.** Mammary gland tissue sections from 15 weeks old wt and *Vim*<sup>-/-</sup> female mice were  
574 labelled for keratin-8 (Krt8; Luminal epithelial) and keratin-14 (Krt14; Basal epithelial)  
575 expression by IHC-P (n=5-6 mice). Scale bar 10  $\mu$ m.

576 **G-H.** Hematoxylin-eosin (HE) stained mammary gland tissue sections from 15 weeks old wt  
577 and *Vim*<sup>-/-</sup> female mice (**G.**) and quantification of mammary ductal lumen area (**H.**). (n = 5  
578 mice; 20-22 ducts per mouse). Scale bar, 100  $\mu$ m. Mean  $\pm$  SEM. Unpaired Student's t-test.

579 **I-J.** Mammary gland tissue sections from 10 weeks old (left) and 15 weeks old (right) wt and  
580 *Vim*<sup>-/-</sup> female mice were labelled for Acta2, Slug and Keratin 8 (krt8) by IHC-P (**I.**). Scale bar  
581 20  $\mu$ m. The number of Slug positive cells per 10  $\mu$ m distance of basement membrane was  
582 quantified from 15 weeks old mice (**J.**). (Mean  $\pm$  SEM; n=3 mice; 10 ducts analysed per  
583 animal). Unpaired Student's t-test.

584

585 **Figure 3. Vimentin knockout MMECs contain reduced proportion of basal cells, and form**  
586 **less mammospheres and filled organoids *in vitro*.**

587 **A-B.** MMECs were isolated from 15-18 weeks old wt and *Vim*<sup>-/-</sup> female mice and  
588 immunolabelled for surface markers. From the lineage negative cells (CD31<sup>neg</sup>CD45<sup>neg</sup>), the  
589 basal epithelial (CD24<sup>int</sup>CD29<sup>+</sup>, CD24<sup>int</sup>CD49f<sup>+</sup>; gate and % of cells indicated in red) and  
590 luminal epithelial (CD24<sup>hi</sup>CD29<sup>neg</sup>, CD24<sup>hi</sup>CD49f<sup>neg</sup>) cell populations were quantified by flow

591 cytometry (**A.**). The ratio between basal and luminal epithelial cells in each sample was  
592 calculated (**B.**).  $n = 3-4$ ; Mean  $\pm$  SEM. Unpaired Student's t-test.

593 **C-E.** Wt and *Vim*<sup>-/-</sup> MMECs were cultured in low attachment conditions to examine the  
594 capacity to form mammospheres. Mammospheres were imaged by bright field microscopy  
595 (**C.**) and the size (**D.**) and number (**E.**) of mammospheres per well (total 6 wells/ genotype)  
596 was quantified. Representative result of two independent experiments is shown. Scale bar,  
597 50  $\mu\text{m}$ . Mean  $\pm$  SEM. Unpaired Student's t-test.

598 **F-G.** The middle plain of organoids formed by wt and *Vim*<sup>-/-</sup> MMECs in 3D Matrigel™  
599 cultures were imaged by confocal microscopy. Representative images of distinct lumen  
600 morphologies observed are shown (**F.**) and the fraction of organoids with or without lumen  
601 was quantified (**G.**). Data was pooled from three independent experiments, each 20-40  
602 organoids per experiment. Scale bar, 50  $\mu\text{m}$ . Fisher's exact test ( $p = 0.0008$ ).

603

604 **Figure 4. Vimentin silencing reduces tumorsphere formation in MDA-MB-231 human**  
605 **breast carcinoma cells.**

606 **A.** Silencing of vimentin expression in MDA-MB-231 breast cancer cells by siRNA smartpool  
607 was verified by western blotting from cell lysates. Control cells were treated with control  
608 siRNA.

609 **B.** Relative expression of cell surface integrin adhesion receptors in control or vimentin  
610 silenced MDA-MB-231 cells was analysed by flow cytometry ( $n = 6-7$  from minimum 4  
611 experiments). Mean  $\pm$  SEM. Paired t-test.

612 **C-E.** Formation of tumorspheres by control or vimentin silenced MDA-MB-231 cells.  
613 Tumorspheres were imaged with bright field microscopy (**C.**) (Scale bar, 400  $\mu\text{m}$ ), and their  
614 number scored per well (**D.**). The protein content of tumorspheres generated by equal  
615 numbers of vimentin silenced and control cells was analysed by loading equal volumes of  
616 cell lysate in SDS-PAGE gels and blotting for the expression of house-keeping protein GAPDH  
617 (**E.**). Representative results of 3 independent experiments are shown. Mean  $\pm$  SEM.  
618 Unpaired Student's t-test.

619

620 **Figure 5. Regenerative capacity is reduced in vimentin knockout mouse mammary gland**

621 **A-B.** Primary mammary gland transplantation. Mammary gland pieces from wt and *Vim*<sup>-/-</sup>  
622 donor mice were transplanted in cleared fat pads of prepubertal wt recipient mice.  
623 Mammary gland whole mounts were prepared 10 weeks later (A.) and the growth area of  
624 the transplant was quantified (B.). Two example whole mounts are shown. (n=10; Mean ±  
625 SEM). Unpaired Student's t-test.

626 **C-D.** Secondary mammary gland transplantation. Mammary gland pieces from wt and *Vim*<sup>-/-</sup>  
627 primary transplants with epithelial growth were further transplanted in cleared fat pads of  
628 prepubertal wt recipient mice. Mammary gland wholemounts were prepared 15 weeks later  
629 (C.) and the growth area of the secondary transplant was quantified (D.). n=5 Mean ± SEM.  
630 Unpaired Student's t-test.

631 **E.** Growth take-on-rate in primary (A-B.) and secondary (C-D.) mammary gland  
632 transplantation experiments with wt or *Vim*<sup>-/-</sup> mammary gland tissue pieces.

633 **F.** Schematic model for the function of vimentin in regulation of mammary stem/progenitor  
634 cell activity and breast cancer stem cell capacity. Reduced proportion of basal epithelial cells  
635 (blue) and enlarged lumen size in vimentin-deficient mammary ducts are depicted. Vimentin  
636 expressing cells are labelled with red.

A.

Human mammary gland

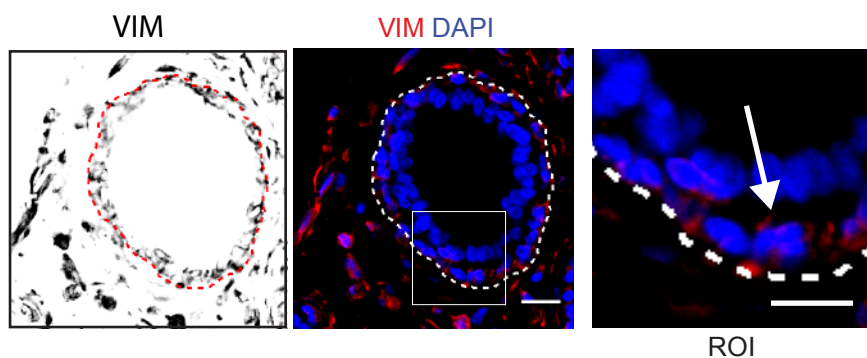

B.

Mouse mammary gland

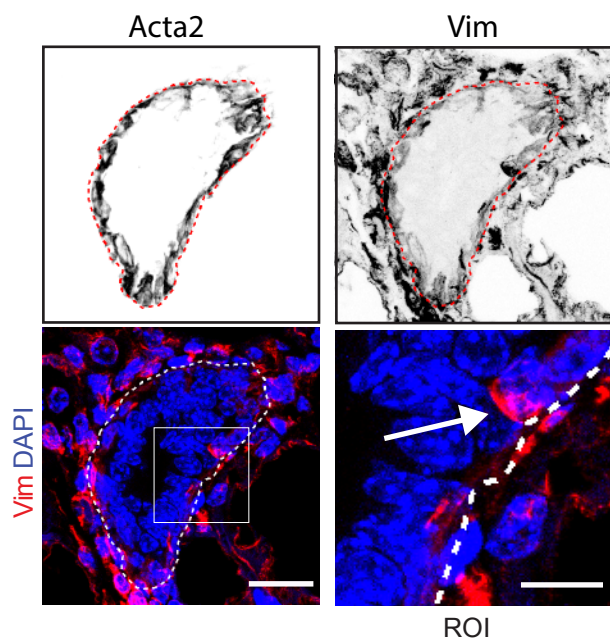

C.

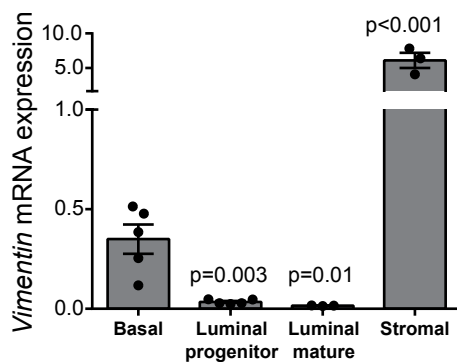



## Figure 2

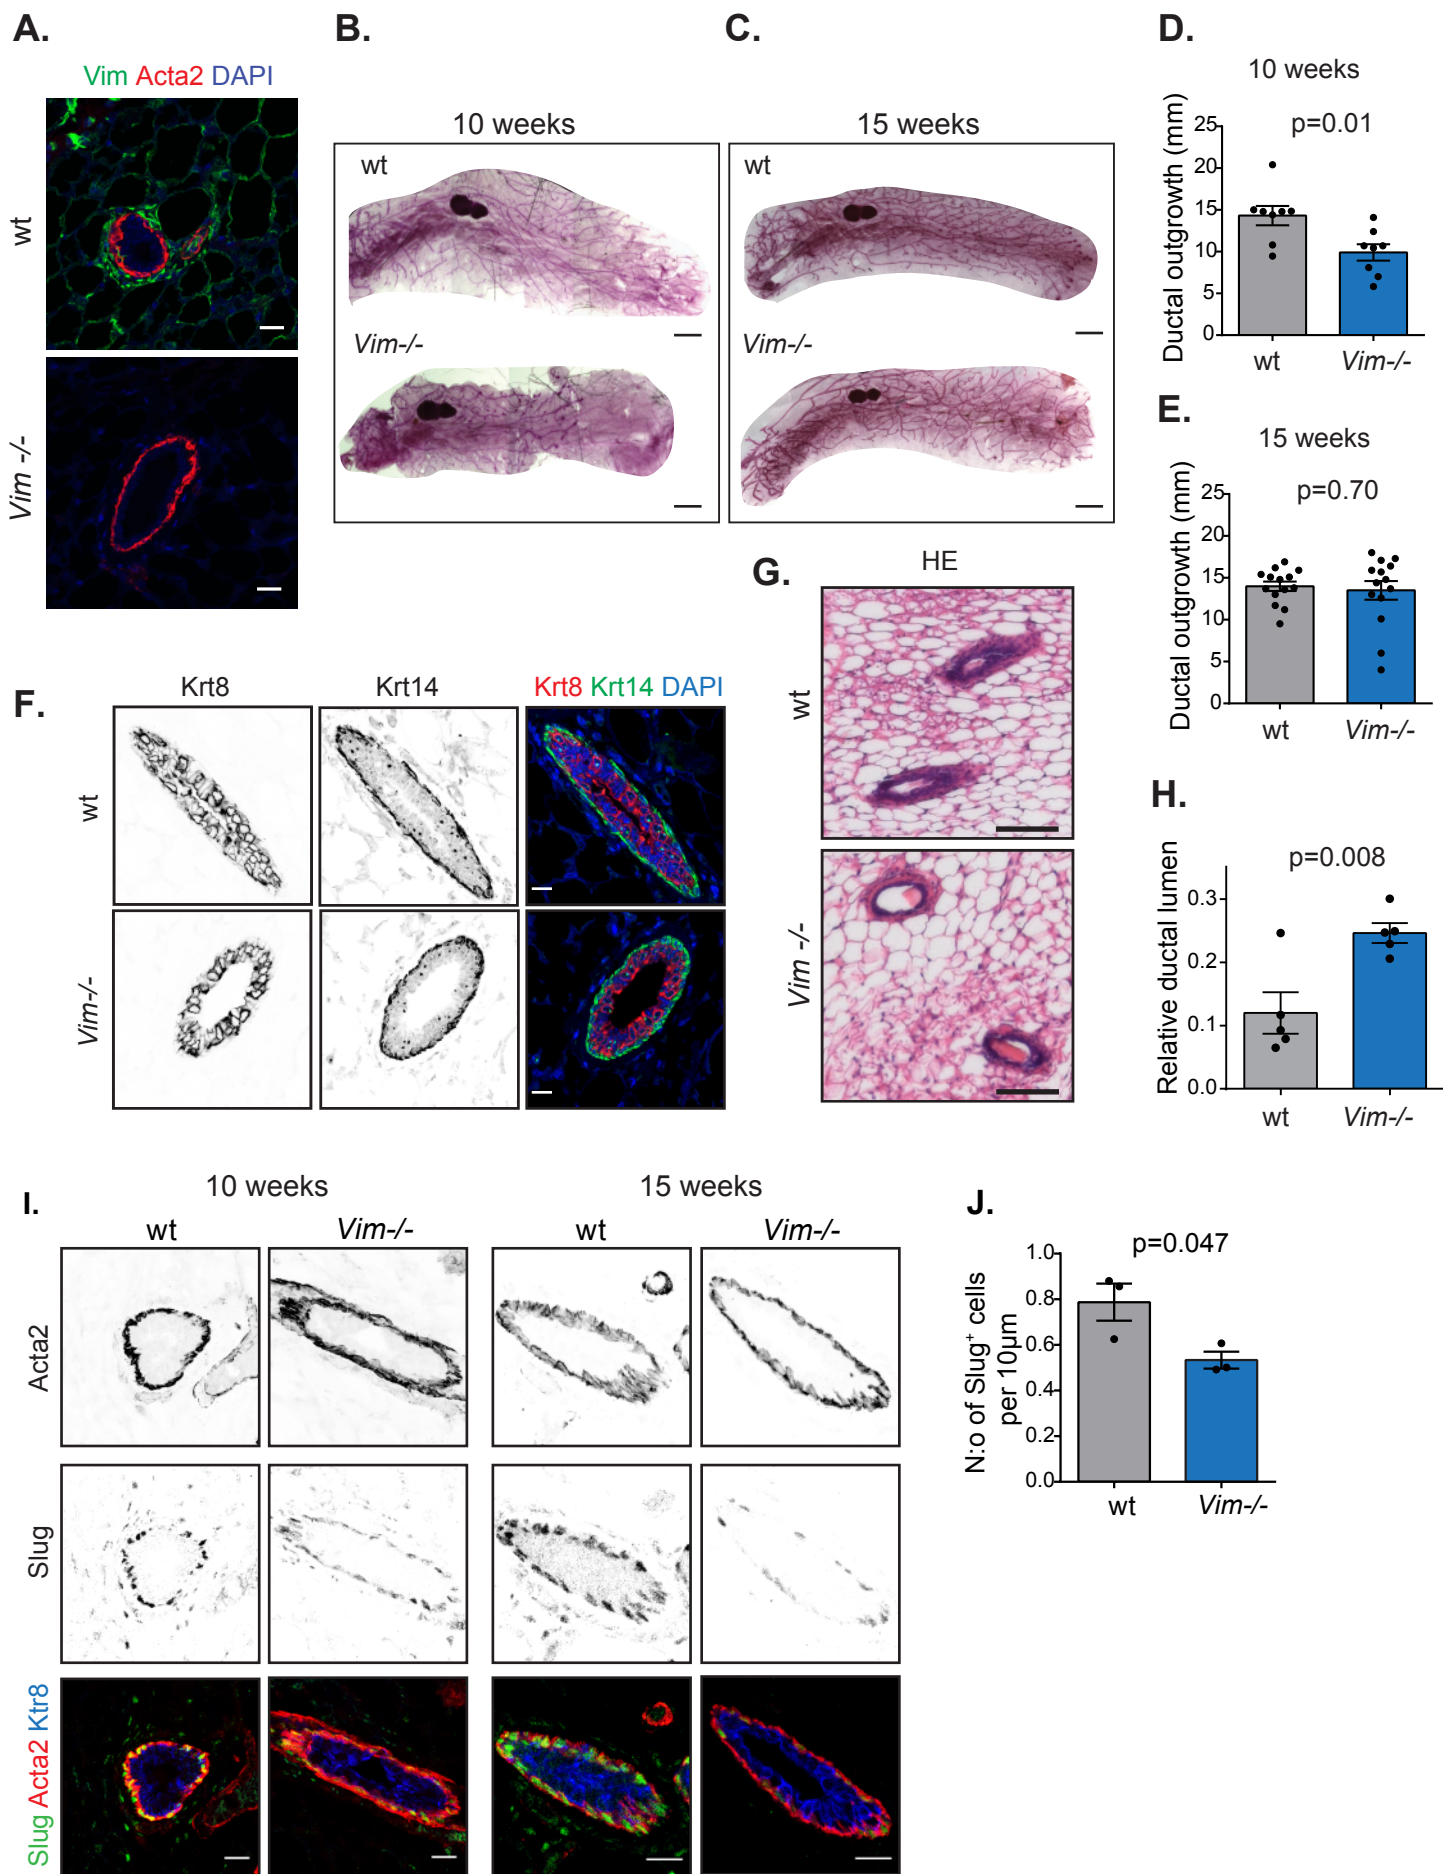

## Figure 3

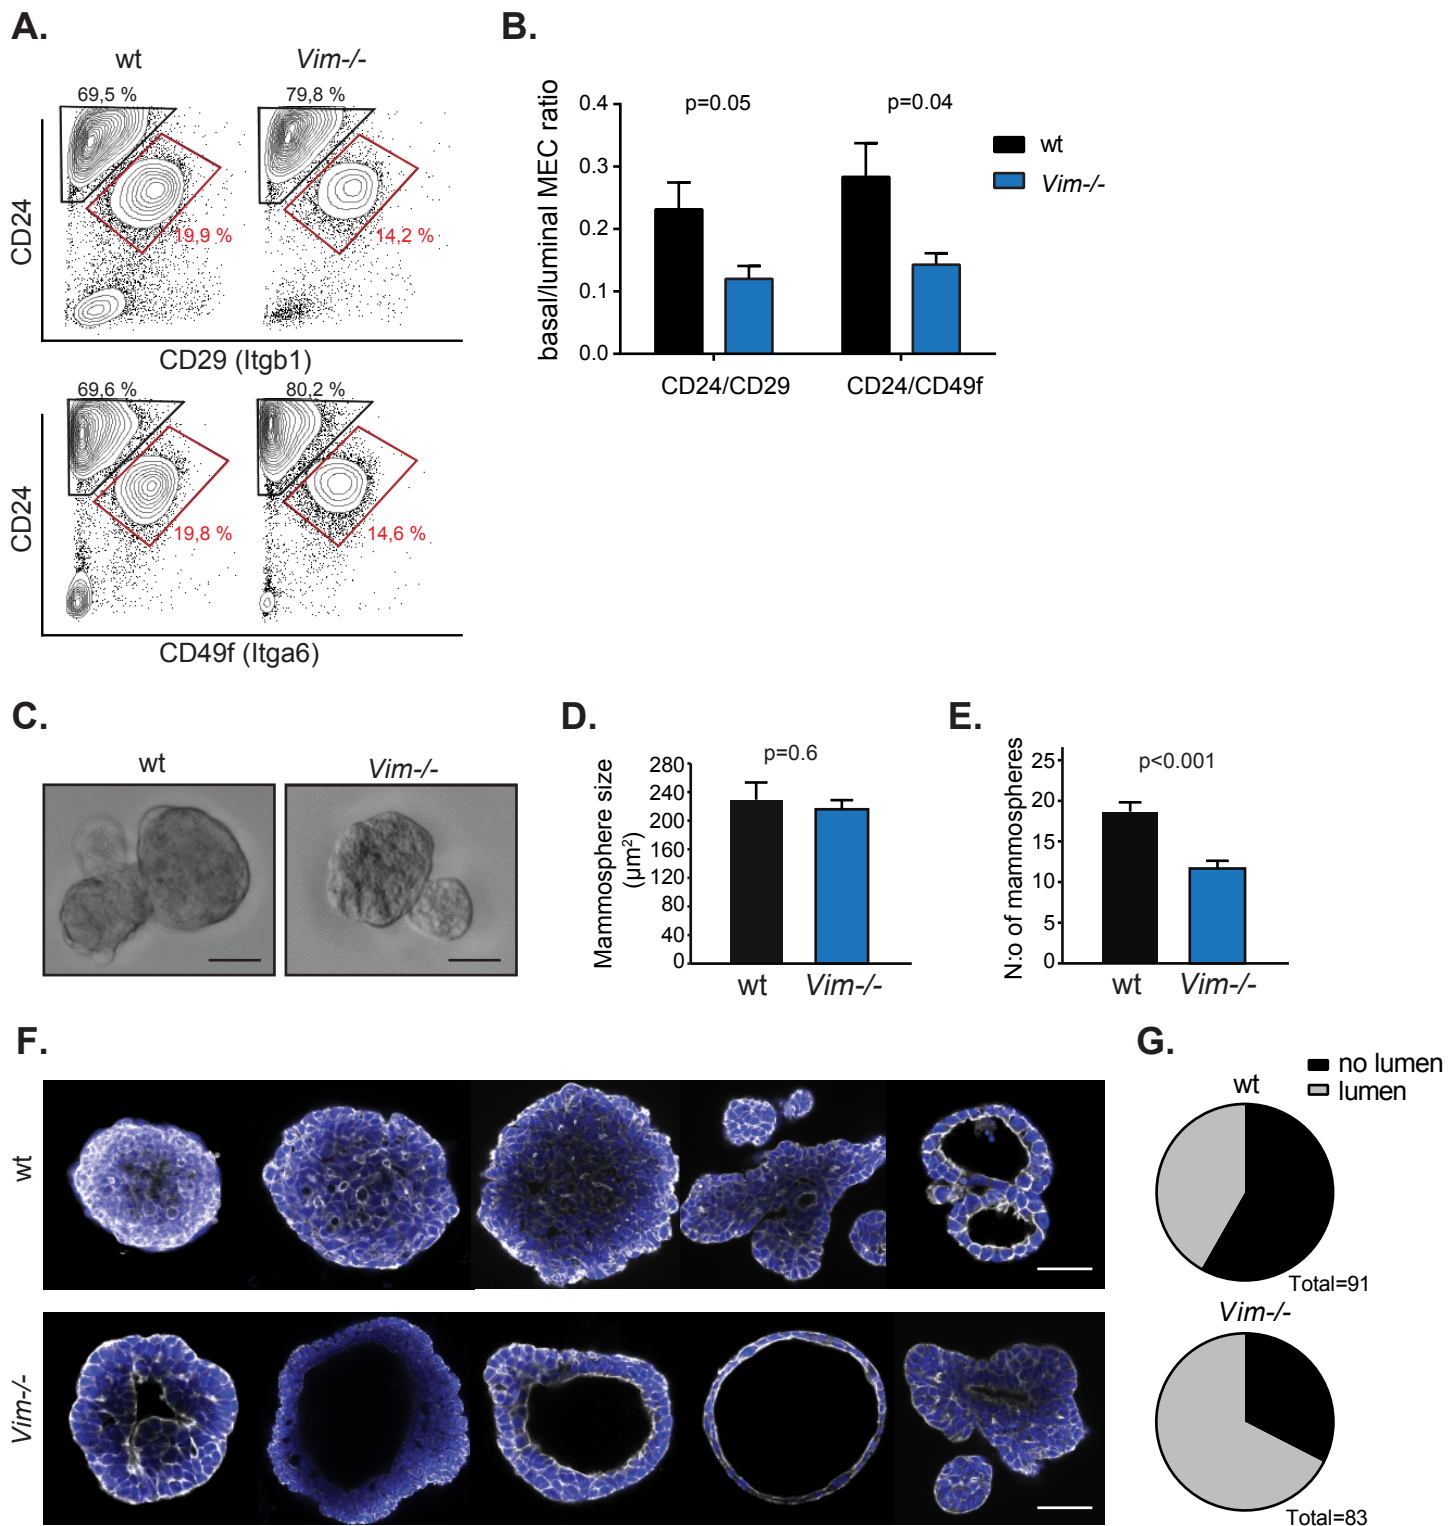

## Figure 4.

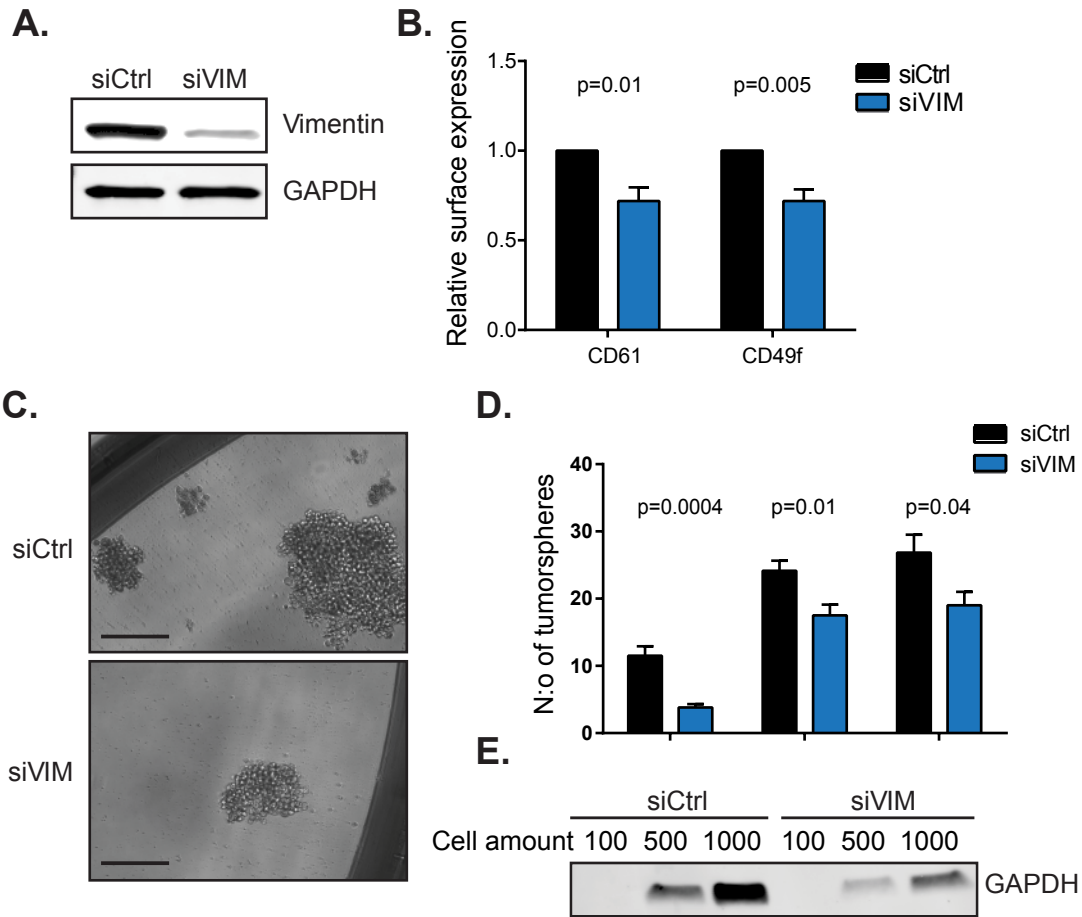

## Figure 5

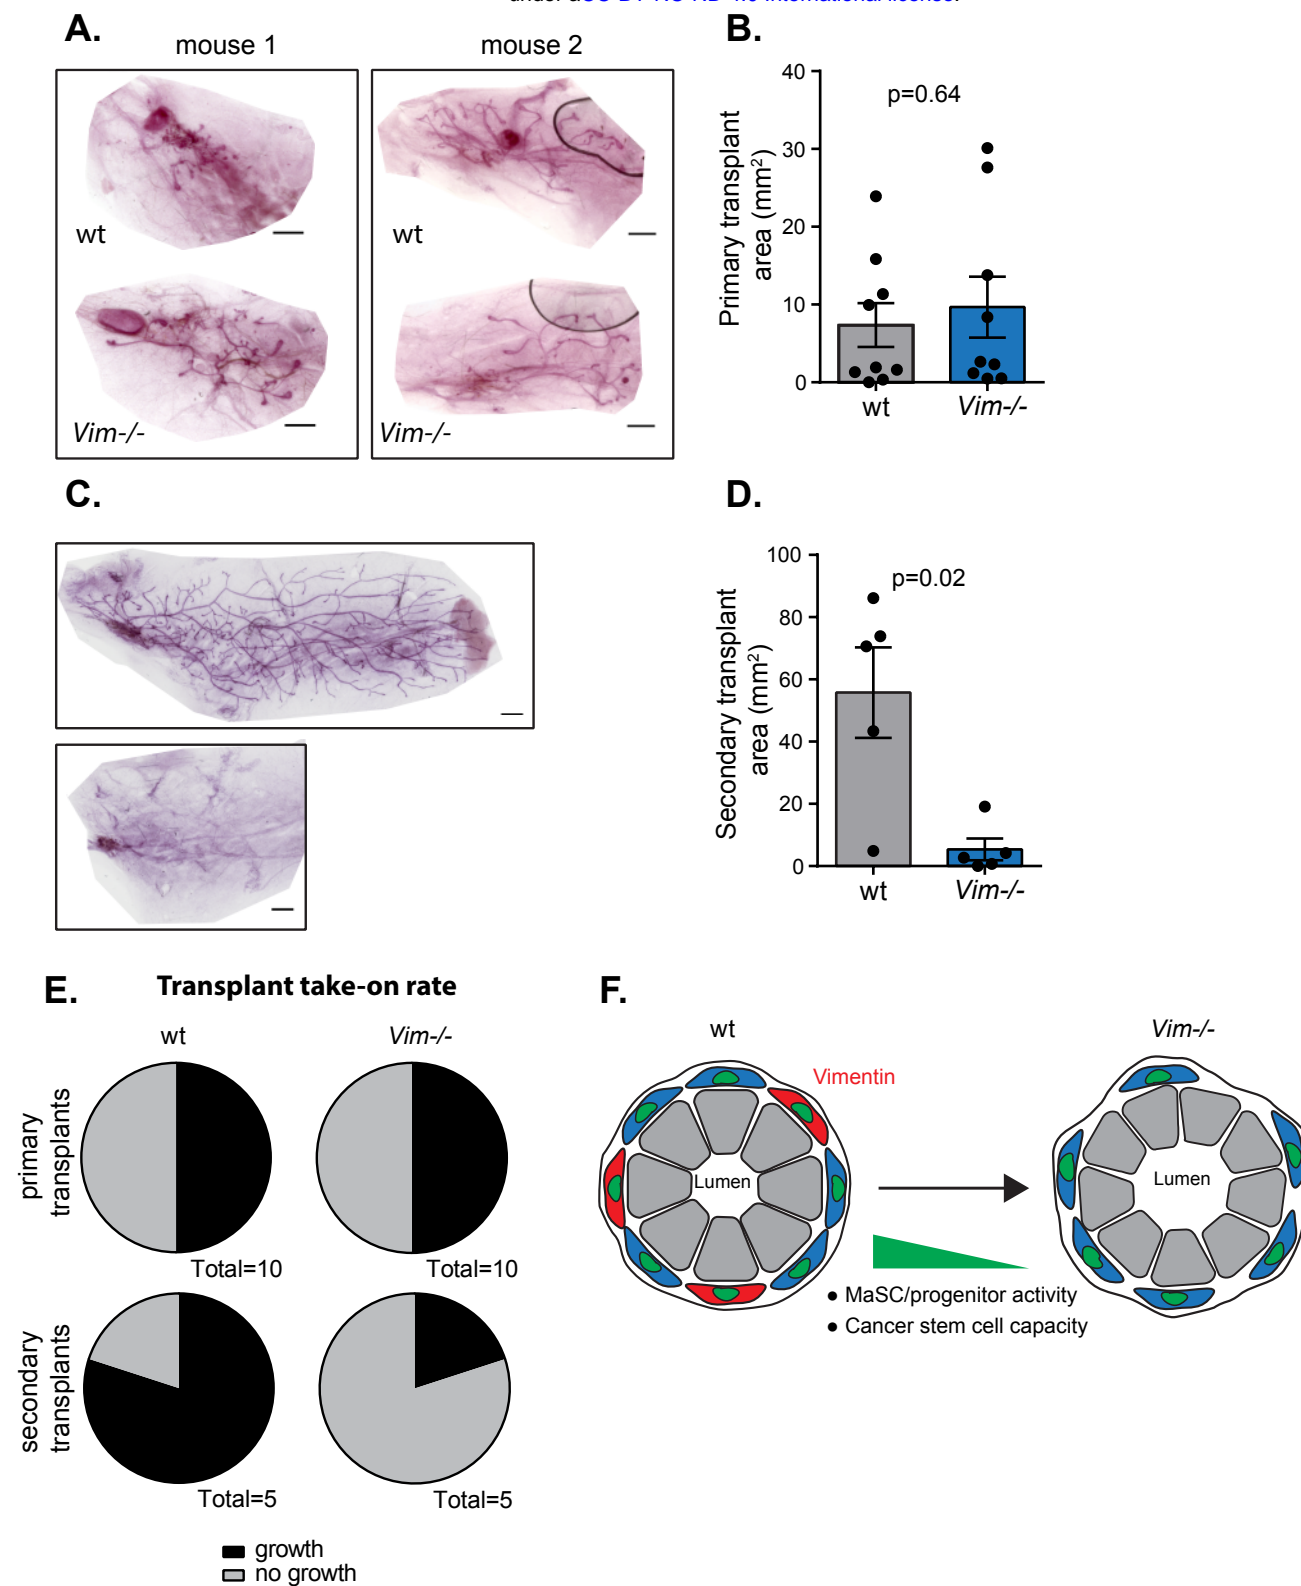

Source: http://biorxiv.org/content/10.1101/134544v1.full.pdf
